# Supplementary material for: p-Type ohmic contact to MoS2via binary compound electrodes
Source: Royal Society of Chemistry journal article supplement (doi:10.1039/d2tc05088a), 2023-01-01
Supplement: d2tc05088a1.pdf [file d2tc05088a1.pdf]

Supplemental Material of:

**P-type Ohmic contact to MoS<sub>2</sub> via binary compound electrodes**

Yin-Ti Ren,<sup>1,2,3</sup> Yuan-Tao Chen,<sup>3</sup> Liang Hu,<sup>3</sup> Jiang-Long Wang,<sup>2</sup> Peng-Lai Gong,<sup>2</sup> Hu Zhang,<sup>2</sup> Li  
Huang,<sup>3,\*</sup> and Xing-Qiang Shi<sup>2,\*</sup>

<sup>1</sup> Harbin Institute of Technology, Harbin 150080, China

<sup>2</sup> College of Physics Science and Technology, Key Laboratory of Optic-Electronic Information and  
Materials of Hebei Province, Institute of Life Science and Green Development, Hebei University,  
Baoding 071002, China

<sup>3</sup> Department of Physics, Southern University of Science and Technology, Shenzhen 518055, China

\*E-mail: shixq20hbu@hbu.edu.cn, huangl@sustech.edu.cn

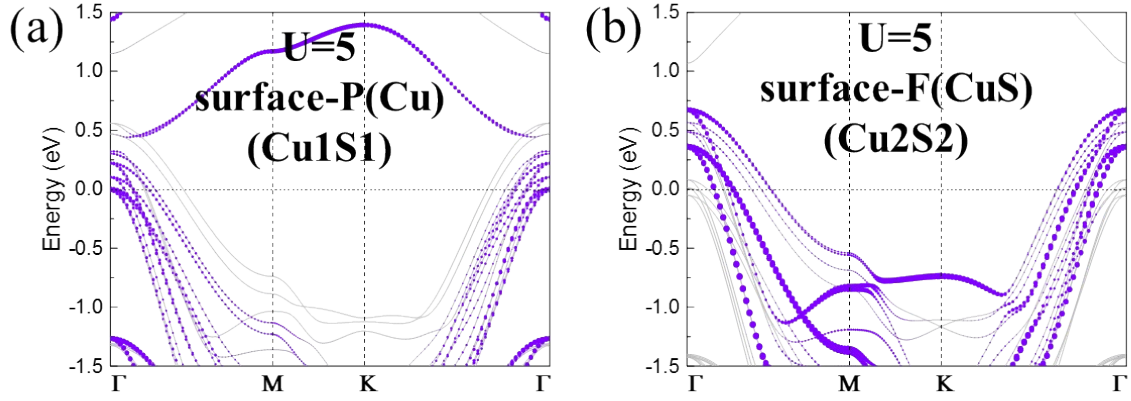

**FIG. S1.** The projected band structure of CuS slab with Hubbard  $U = 5$  eV. The projected band structures of (a) P(Cu) surface (Cu1S1) and (b) F(Cu-S) surface (Cu2S2) in the CuS slab. The Fermi level was set to zero.

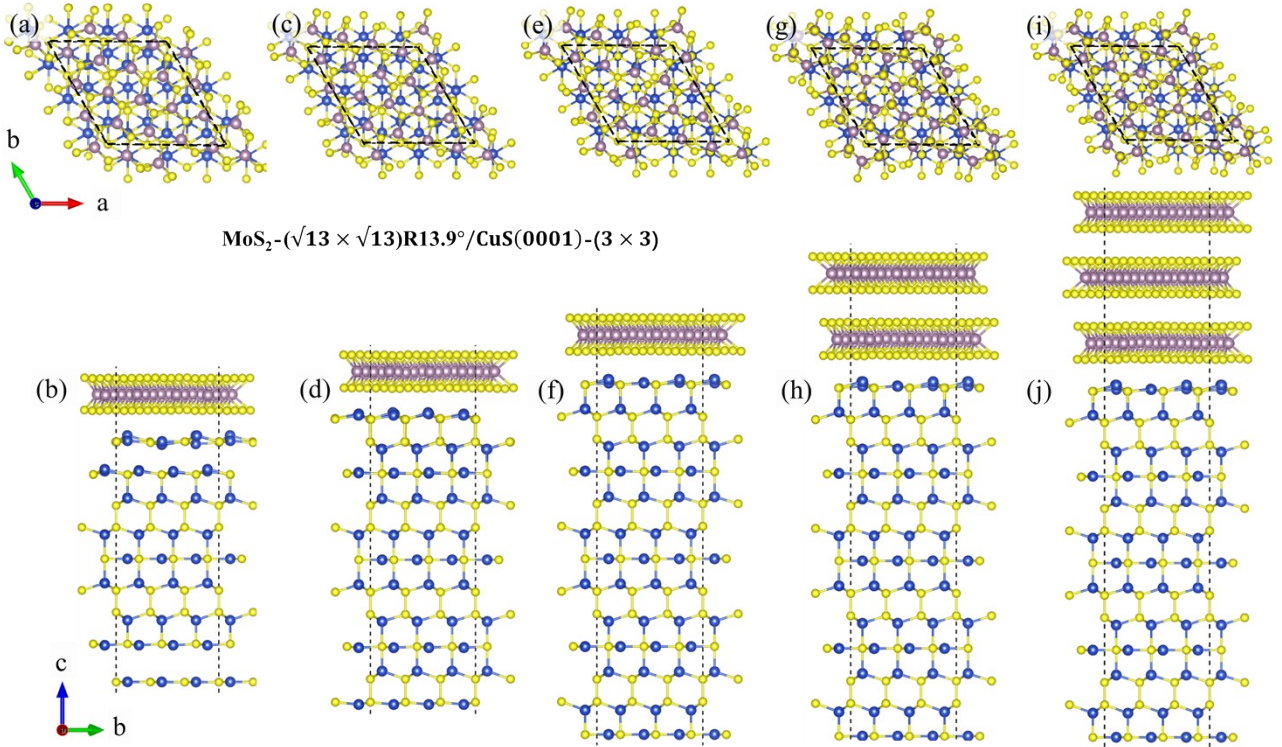

**FIG. S2.** The structure of CuS/MoS<sub>2</sub> junctions. (a) and (b) are top view and side view of P(S)/monolayer MoS<sub>2</sub> junction, (c) and (d) are top view and side view of P(Cu)/monolayer MoS<sub>2</sub> junction, (e) and (f) are top view and side view of F(Cu-S)/monolayer MoS<sub>2</sub> junction, (g) and (h) are top view and side view of F(Cu-S)/bilayer MoS<sub>2</sub> junction, and (i) and (j) are top view and side view of F(Cu-S)/trilayer MoS<sub>2</sub> junction, respectively. The dashed black line indicate the supercell of CuS/MoS<sub>2</sub> junctions.

*F(Cu-S)/few-layer MoS<sub>2</sub> junctions.* As shown in Figs. S3(a) and S3(c), the band structures of bilayer and trilayer MoS<sub>2</sub> with a ( $\sqrt{13} \times \sqrt{13}$ )R13.9° supercell show an indirect band gap of 1.22 and 1.11 eV, respectively, which are in good agreement with that in the literature.<sup>1</sup> From monolayer to few-layer, the decrease of band gap originates from the quasi-bonding interactions between MoS<sub>2</sub> layers, which are significant for many layered 2D materials if the band edges of monolayer have out-of-plane orbitals that contribute to the interlayer quasi-bonding.<sup>2-4</sup>

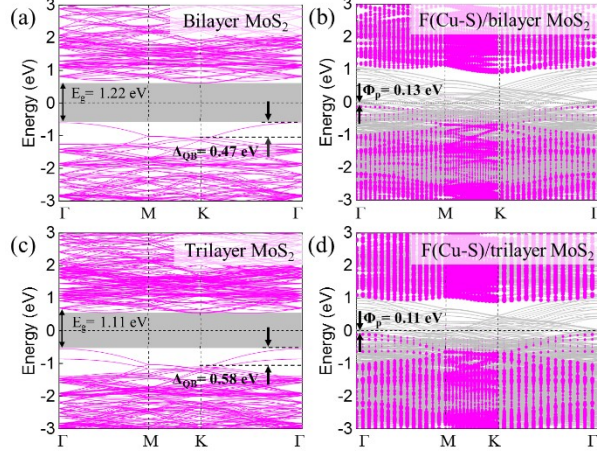

**FIG. S3. Band structures of few-layer MoS<sub>2</sub> and the Schottky barrier heights in F(Cu-S)/few-layer MoS<sub>2</sub> junctions.** The band structures of (a) bilayer and (c) trilayer MoS<sub>2</sub> with a ( $\sqrt{13} \times \sqrt{13}$ )R13.9° supercell. The projected band structures of (b) bilayer MoS<sub>2</sub> in F(Cu-S)/bilayer MoS<sub>2</sub> junction and (d) trilayer MoS<sub>2</sub> in F(Cu-S)/trilayer MoS<sub>2</sub> junction.  $\Phi_p$  represent the *p*-type SBH of holes. The Fermi level was set to zero.

Table SI. Vertical separation (*D*) between the outer atoms of MoS<sub>2</sub> and F(Cu-S) surface, work function of the F(Cu-S) surface ( $W_M$ ) and the F(Cu-S) surface with MoS<sub>2</sub> adsorption ( $W_{MS}$ ), interface potential step induced SBH correction ( $\Delta V$ ), QBIGS induced SBH correction ( $\Delta_{QB}$ ), and SBH ( $\Phi_{SB}$ ) in the F(Cu-S)/MoS<sub>2</sub> junction from the projected band structure. In the  $\Phi_{SB}$  values, *p* means *p*-type Schottky barrier.

| <b>D</b> | $W_M$ | $W_{MS}$ | $\Delta V$ | $\Delta_{QB}$ | $\Phi_{SB}$ |
|----------|-------|----------|------------|---------------|-------------|
| (Å)      | (eV)  | (eV)     | (eV)       | (eV)          | (eV)        |
| 2.66     |       | 5.31     | 0.20       | 0.52          | 0.18        |
| 2.76     |       | 5.30     | 0.21       | 0.47          | 0.23        |
| 2.86     | 5.51  | 5.29     | 0.22       | 0.41          | 0.31        |
| 2.96     |       | 5.26     | 0.25       | 0.34          | 0.37        |
| 3.06     |       | 5.26     | 0.25       | 0.28          | 0.42        |

## REFERENCES

- 1 T. Brumme, M. Calandra, F. Mauri. *Phys. Rev. B*, 2015, **91**, 155436.
- 2 Y. D. Zhao, J. S. Qiao, P. Yu, Z. X. Hu, Z. Y. Lin, S. P. Lau, Z. Liu, W. Ji, Y. Chai. *Adv. Mater.*, 2016, **28**, 2399-2407.
- 3 D. D. Wang, X. G. Gong, J. H. Yang. *Nanoscale*, 2021, **13**, 14621-14627.
- 4 P. L. Gong, F. Zhang, L. F. Huang, H. Zhang, L. Li, R. C. Xiao, B. Deng, H. Pan, X. Q. Shi. *J. Phys.: Condens. Matter*, 2018, **30**, 475702.
